# Supplementary material for: Comparison of hunting site strategies of the common buzzard Buteo buteo in open landscapes and along expressways
Source: PeerJ. 2024 Sep 19;12:e18045. doi: 10.7717/peerj.18045 (PMC11416756; doi:10.7717/peerj.18045)
Supplement: Supplemental Information 1 [file peerj-12-18045-s001.xlsx]

## Sheet: Arkusz1
Attack	Change	id	Season	Habitat	Snow	Temp	Precip	Wind	TimeHigh	TimeMedium	TimeLow
2	3	4	2021	expressway	absent	6.2	0	4.8	0	368	128
0	1	5	2021	expressway	absent	6.2	0	4.8	0	569	0
0	0	6	2021	expressway	absent	6.2	0	4.8	0	529	0
0	0	7	2021	expressway	absent	5.6	0	5	0	600	0
1	2	8	2021	expressway	absent	5.8	0.51	5.6	554	0	0
0	0	9	2021	expressway	absent	5.8	0.51	5.6	0	506	0
1	2	14	2021	expressway	absent	0.2	0	12.4	580	0	0
0	1	15	2021	expressway	absent	0.2	0	12.4	0	595	0
1	1	16	2021	expressway	absent	0.2	0	12.4	0	445	68
3	4	17	2021	expressway	absent	0.2	0	12.4	0	522	55
0	0	23	2021	expressway	present	-1.1	0	8.9	0	568	0
0	7	24	2021	expressway	present	-1.1	0	8.9	74	0	342
1	3	28	2021	expressway	absent	-2	0	18.3	0	494	87
0	3	29	2021	expressway	absent	-2	0	18.3	0	575	0
2	3	30	2021	expressway	absent	-2	0	18.3	33	510	31
0	0	34	2021	expressway	present	0.7	0	10.7	0	557	0
0	0	35	2021	expressway	present	0.7	0	10.7	596	0	0
0	2	36	2021	expressway	present	0.7	0	10.7	0	596	0
0	0	39	2021	expressway	absent	1.7	0	10.4	0	600	0
0	1	40	2021	expressway	absent	1.7	0	10.4	0	597	0
0	1	41	2021	expressway	absent	1.7	0	10.4	540	0	0
2	2	42	2021	expressway	absent	1.7	0	10.4	0	535	15
0	0	49	2021	expressway	absent	2.7	1.02	4.6	0	600	0
1	1	50	2021	expressway	absent	2.7	1.02	4.6	572	0	5
3	3	51	2021	expressway	absent	2.7	1.02	4.6	412	0	89
0	3	52	2021	expressway	absent	2.7	1.02	4.6	0	558	0
0	1	56	2021	expressway	absent	1.3	0	11.1	0	598	0
0	1	57	2021	expressway	absent	1.3	0	11.1	71	515	0
2	3	58	2021	expressway	absent	1.3	0	11.1	0	444	101
0	1	59	2021	expressway	absent	1.3	0	11.1	0	598	0
1	1	63	2021	expressway	present	-1.1	1.52	4.6	0	540	52
1	1	64	2021	expressway	present	-1.1	1.52	4.6	0	565	30
0	2	65	2021	expressway	present	-1.1	1.52	4.6	570	0	0
0	0	70	2021	expressway	present	-18.1	1.78	6.1	595	0	0
0	0	71	2021	expressway	present	-18.1	1.78	6.1	0	566	0
0	1	72	2021	expressway	present	-18.1	1.78	6.1	0	566	0
0	1	75	2021	expressway	present	0.8	0.25	7	0	595	0
1	2	76	2021	expressway	present	0.8	0.25	7	0	549	34
0	1	77	2021	expressway	present	0.8	0.25	7	174	417	0
1	2	78	2021	expressway	present	0.8	0.25	7	0	450	124
1	2	79	2021	expressway	present	0.8	0.25	7	0	530	53
1	0	84	2021	expressway	present	-4.9	0.76	12.2	0	278	320
1	1	85	2021	expressway	present	-4.9	0.76	12.2	262	0	295
0	0	88	2021	expressway	present	-14.7	0	10	600	0	0
0	0	89	2021	expressway	present	-14.7	0	10	600	0	0
0	1	90	2021	expressway	present	-14.7	0	10	40	524	0
0	0	91	2021	expressway	present	-14.7	0	10	590	0	0
0	0	93	2021	expressway	present	-0.3	0	12.2	600	0	0
0	0	94	2021	expressway	present	-0.3	0	12.2	600	0	0
0	1	102	2021	expressway	present	1.3	0	5.7	0	0	593
0	0	103	2021	expressway	present	1.3	0	5.7	600	0	0
0	0	104	2021	expressway	present	1.3	0	5.7	600	0	0
1	2	105	2021	expressway	present	1.3	0	5.7	429	0	165
0	0	110	2021	expressway	absent	3.2	0	11.3	600	0	0
0	1	111	2021	expressway	absent	3.2	0	11.3	595	0	0
1	2	112	2021	expressway	absent	3.2	0	11.3	525	0	32
0	2	116	2022	expressway	absent	6.9	0	16.1	0	566	12
1	4	117	2022	expressway	absent	6.9	0	16.1	318	0	210
0	0	118	2022	expressway	absent	6.9	0	16.1	0	600	0
1	3	119	2022	expressway	absent	6.9	0	16.1	548	0	0
0	0	124	2022	expressway	absent	6.3	0	5.6	0	600	0
2	1	125	2022	expressway	absent	6.3	0	5.6	0	482	110
2	0	126	2022	expressway	absent	6.3	0	5.6	0	588	8
0	0	127	2022	expressway	absent	6.3	0	5.6	0	600	0
0	0	128	2022	expressway	absent	6.3	0	5.6	600	0	0
0	0	132	2022	expressway	absent	7.5	0	12.2	600	0	0
3	3	133	2022	expressway	absent	7.5	0	12.2	0	556	32
0	0	134	2022	expressway	absent	7.5	0	12.2	0	60	0
0	0	138	2022	expressway	present	0.3	1.02	6.5	0	600	0
0	2	139	2022	expressway	present	0.3	1.02	6.5	0	518	56
1	0	140	2022	expressway	present	0.3	1.02	6.5	0	589	9
0	0	141	2022	expressway	present	0.3	1.02	6.5	0	332	0
1	1	145	2022	expressway	present	-1.7	0	7.2	452	0	132
0	0	146	2022	expressway	present	-1.7	0	7.2	600	0	0
0	2	147	2022	expressway	present	-1.7	0	7.2	119	422	0
0	0	148	2022	expressway	present	-1.7	0	7.2	0	600	0
0	0	154	2022	expressway	present	-2.9	0	3.9	600	0	0
0	0	155	2022	expressway	present	-2.9	0	3.9	600	0	0
0	0	156	2022	expressway	present	-2.9	0	3.9	600	0	0
0	0	161	2022	expressway	absent	2.9	0.51	12.6	600	0	0
0	1	162	2022	expressway	absent	2.9	0.51	12.6	518	0	0
0	0	163	2022	expressway	absent	2.9	0.51	12.6	600	0	0
4	1	164	2022	expressway	absent	2.9	0.51	12.6	0	509	50
1	1	169	2022	expressway	present	-1.8	0.76	9.1	0	0	592
0	1	170	2022	expressway	present	-1.8	0.76	9.1	594	0	0
1	0	171	2022	expressway	present	-1.8	0.76	9.1	0	0	593
0	0	172	2022	expressway	present	-1.8	0.76	9.1	0	600	0
1	0	175	2022	expressway	absent	5	0	11.7	0	590	7
0	0	176	2022	expressway	absent	5	0	11.7	600	0	0
0	0	177	2022	expressway	absent	5	0	11.7	0	600	0
0	0	183	2022	expressway	present	-2.1	0	5.6	600	0	0
0	0	184	2022	expressway	present	-2.1	0	5.6	0	600	0
0	0	185	2022	expressway	present	-2.1	0	5.6	0	600	0
1	1	186	2022	expressway	present	-2.1	0	5.6	0	569	26
0	1	188	2022	expressway	absent	-1	0	12.8	255	0	310
0	3	189	2022	expressway	absent	-1	0	12.8	276	279	0
1	0	190	2022	expressway	absent	-1	0	12.8	0	590	8
0	0	191	2022	expressway	absent	-1	0	12.8	0	600	0
0	0	192	2022	expressway	absent	-1	0	12.8	600	0	0
0	0	193	2022	expressway	present	-1.6	0.76	10.4	600	0	0
1	5	194	2022	expressway	present	-1.6	0.76	10.4	0	449	20
0	0	195	2022	expressway	present	-1.6	0.76	10.4	600	0	0
0	2	196	2022	expressway	present	-1.6	0.76	10.4	579	0	0
0	0	201	2022	expressway	absent	-1.4	0.51	12.2	600	0	0
0	2	205	2022	expressway	present	-0.7	1.02	11.5	527	43	0
0	0	206	2022	expressway	present	-0.7	1.02	11.5	0	600	0
0	1	207	2022	expressway	present	-0.7	1.02	11.5	541	0	0
0	1	208	2022	expressway	present	-0.7	1.02	11.5	594	0	0
0	0	213	2022	expressway	absent	3.2	2.79	16.1	600	0	0
0	3	214	2022	expressway	absent	3.2	2.79	16.1	0	587	0
0	1	215	2022	expressway	absent	3.2	2.79	16.1	133	457	0
0	0	219	2022	expressway	present	0.2	0	10.6	0	600	0
0	0	220	2022	expressway	present	0.2	0	10.6	0	600	0
2	4	221	2022	expressway	present	0.2	0	10.6	0	538	40
0	2	222	2022	expressway	present	0.2	0	10.6	0	593	0
0	2	225	2022	expressway	absent	2.7	3.05	12.8	0	589	0
1	4	226	2022	expressway	absent	2.7	3.05	12.8	0	560	21
0	3	227	2022	expressway	absent	2.7	3.05	12.8	0	562	0
0	0	232	2022	expressway	absent	-0.2	0	7.2	600	0	0
1	3	233	2022	expressway	absent	-0.2	0	7.2	0	546	35
0	1	234	2022	expressway	absent	-0.2	0	7.2	85	0	0
2	2	235	2022	expressway	absent	-0.2	0	7.2	0	537	0
0	0	1	2021	farmland	absent	8.9	0	10.2	272	0	0
0	0	2	2021	farmland	absent	8.9	0	10.2	600	0	0
0	2	3	2021	farmland	absent	8.9	0	10.2	569	0	0
0	0	10	2021	farmland	absent	5.8	0.51	5.6	0	600	0
0	1	11	2021	farmland	absent	7.9	2.79	8.9	275	312	0
0	0	12	2021	farmland	absent	7.9	2.79	8.9	534	0	0
0	0	13	2021	farmland	absent	7.9	2.79	8.9	314	0	0
0	0	18	2021	farmland	absent	5.6	1.52	13	597	0	0
0	1	19	2021	farmland	absent	5.6	1.52	13	598	0	0
0	1	20	2021	farmland	absent	1.3	0.25	8	553	0	0
0	1	21	2021	farmland	absent	1.3	0.25	8	568	0	0
4	1	22	2021	farmland	absent	1.3	0.25	8	197	0	374
0	1	25	2021	farmland	absent	6.4	0	15.4	440	124	0
0	1	26	2021	farmland	absent	6.4	0	15.4	0	0	0
0	1	27	2021	farmland	absent	6.4	0	15.4	594	0	0
2	2	31	2021	farmland	present	0.4	1.78	15.6	406	0	158
1	5	32	2021	farmland	present	0.4	1.78	15.6	11	0	262
0	1	33	2021	farmland	present	0.4	1.78	15.6	576	0	0
0	0	37	2021	farmland	absent	1.5	0	9.1	0	600	0
0	0	38	2021	farmland	absent	1.5	0	9.1	600	0	0
0	3	43	2021	farmland	absent	0	0.25	10.4	402	0	4
0	0	44	2021	farmland	absent	0	0.25	10.4	600	0	0
1	1	45	2021	farmland	absent	0	0.25	10.4	410	0	130
3	3	46	2021	farmland	absent	3.4	0	18.5	0	499	72
3	4	47	2021	farmland	absent	3.4	0	18.5	0	510	68
3	3	48	2021	farmland	absent	3.4	0	18.5	0	456	87
1	0	53	2021	farmland	absent	-0.1	0	6.3	13	0	575
0	1	54	2021	farmland	absent	-0.1	0	6.3	493	0	57
0	0	55	2021	farmland	absent	-0.1	0	6.3	600	0	0
0	1	60	2021	farmland	absent	0.4	0	6.5	541	0	0
0	3	61	2021	farmland	absent	0.4	0	6.5	314	0	10
1	3	62	2021	farmland	absent	0.4	0	6.5	440	0	74
0	1	66	2021	farmland	present	-8.4	0	6.1	457	0	0
0	0	67	2021	farmland	present	-8.4	0	6.1	0	0	600
0	1	68	2021	farmland	present	-8.4	0	6.1	557	0	0
0	1	69	2021	farmland	present	-10.7	0	12.2	576	0	0
0	1	73	2021	farmland	present	2.9	0	7.8	437	0	76
0	0	74	2021	farmland	present	2.9	0	7.8	600	0	0
0	0	80	2021	farmland	present	-2.1	0	5.9	0	586	0
0	0	81	2021	farmland	present	-2.1	0	5.9	0	600	0
0	0	82	2021	farmland	present	-2.1	0	5.9	0	465	0
0	0	83	2021	farmland	present	-2.1	0	5.9	0	0	584
0	0	86	2021	farmland	present	-10.5	1.52	6.1	0	0	600
0	0	87	2021	farmland	present	-10.5	1.52	6.1	600	0	0
0	1	92	2021	farmland	present	-0.9	0	12	255	0	313
0	0	95	2021	farmland	present	-3.6	0	7.4	600	0	0
0	0	96	2021	farmland	present	-3.6	0	7.4	598	0	0
0	1	97	2021	farmland	present	1.1	0	5.4	570	0	0
0	0	98	2021	farmland	present	1.1	0	5.4	596	0	0
0	1	99	2021	farmland	present	1.1	0	5.4	552	0	0
0	1	100	2021	farmland	present	1.1	0	5.4	596	0	0
0	1	101	2021	farmland	present	1.1	0	5.4	596	0	0
0	1	106	2021	farmland	absent	4.3	0	12.6	446	0	0
0	0	107	2021	farmland	absent	4.3	0	12.6	0	0	600
1	4	108	2021	farmland	absent	4.3	0	12.6	0	0	572
1	3	109	2021	farmland	absent	4.3	0	12.6	0	0	582
0	0	113	2022	farmland	absent	7.9	0.51	15.4	600	0	0
0	0	114	2022	farmland	absent	7.9	0.51	15.4	0	600	0
0	1	115	2022	farmland	absent	7.9	0.51	15.4	485	102	0
0	1	120	2022	farmland	absent	2.8	0	5.4	525	0	0
0	0	121	2022	farmland	absent	2.8	0	5.4	600	0	0
0	1	122	2022	farmland	absent	2.8	0	5.4	559	0	0
0	0	123	2022	farmland	absent	2.8	0	5.4	600	0	0
0	0	135	2022	farmland	present	0.6	21.08	6.7	600	0	0
1	0	136	2022	farmland	present	0.6	21.08	6.7	596	0	0
0	0	137	2022	farmland	present	0.6	21.08	6.7	600	0	0
0	0	142	2022	farmland	present	-0.8	0	8.9	600	0	0
0	0	143	2022	farmland	present	-0.8	0	8.9	600	0	0
0	1	144	2022	farmland	present	-0.8	0	8.9	589	0	0
0	0	149	2022	farmland	present	-0.7	0.76	3.5	600	0	0
0	1	150	2022	farmland	present	-0.7	0.76	3.5	0	578	0
0	0	151	2022	farmland	present	-0.7	0.76	3.5	600	0	0
0	0	152	2022	farmland	present	-0.7	0.76	3.5	600	0	0
0	0	153	2022	farmland	present	-0.7	0.76	3.5	600	0	0
0	0	157	2022	farmland	absent	3.1	0	9.6	600	0	0
0	0	158	2022	farmland	absent	3.1	0	9.6	600	0	0
0	0	159	2022	farmland	absent	3.1	0	9.6	600	0	0
0	0	160	2022	farmland	absent	3.1	0	9.6	600	0	0
0	0	165	2022	farmland	present	-3.7	0	9.6	600	0	0
0	0	166	2022	farmland	present	-3.7	0	9.6	600	0	0
0	0	167	2022	farmland	present	-3.7	0	9.6	600	0	0
0	1	168	2022	farmland	present	-3.7	0	9.6	550	0	0
0	0	173	2022	farmland	present	-7.2	0	13.7	600	0	0
0	0	174	2022	farmland	present	-7.2	0	13.7	600	0	0
0	0	178	2022	farmland	present	-2.5	0	8.5	600	0	0
0	0	179	2022	farmland	present	-2.5	0	8.5	600	0	0
0	2	180	2022	farmland	present	-2.5	0	8.5	570	0	0
0	0	181	2022	farmland	present	-2.5	0	8.5	600	0	0
2	1	182	2022	farmland	present	-2.5	0	8.5	559	0	32
0	0	187	2022	farmland	absent	0.3	0	9.6	600	0	0
0	0	197	2022	farmland	present	-1.6	0.76	10.4	600	0	0
1	1	198	2022	farmland	present	-1.6	0.76	10.4	521	0	2
0	0	199	2022	farmland	present	-1.6	0.76	10.4	600	0	0
0	0	200	2022	farmland	absent	-1.4	0.51	12.2	600	0	0
0	1	202	2022	farmland	absent	-1.4	0.51	12.2	0	0	594
0	0	203	2022	farmland	absent	-1.4	0.51	12.2	600	0	0
0	0	204	2022	farmland	absent	-1.4	0.51	12.2	0	0	322
0	1	209	2022	farmland	present	-0.5	0.25	7	503	0	68
0	1	210	2022	farmland	present	-0.5	0.25	7	350	0	0
1	4	211	2022	farmland	present	-0.5	0.25	7	0	0	534
0	1	212	2022	farmland	present	-0.5	0.25	7	588	0	0
0	0	216	2022	farmland	present	-0.1	2.29	9.4	600	0	0
1	1	217	2022	farmland	present	-0.1	2.29	9.4	577	0	15
0	0	218	2022	farmland	present	-0.1	2.29	9.4	600	0	0
0	0	223	2022	farmland	absent	5.7	3.81	25.2	600	0	0
0	0	224	2022	farmland	absent	5.7	3.81	25.2	600	0	0
0	0	228	2022	farmland	absent	2.5	0	5.6	600	0	0
0	0	229	2022	farmland	absent	2.5	0	5.6	600	0	0
0	0	230	2022	farmland	absent	2.5	0	5.6	600	0	0
0	0	231	2022	farmland	absent	2.5	0	5.6	600	0	0
